# Supplementary material for: Identification of molecular subtypes and prognostic signature for hepatocellular carcinoma based on genes associated with homologous recombination deficiency
Source: PubMed Central journal article supplement (PMC8674316; doi:10.1038/s41598-021-03432-3), 2021-12-15

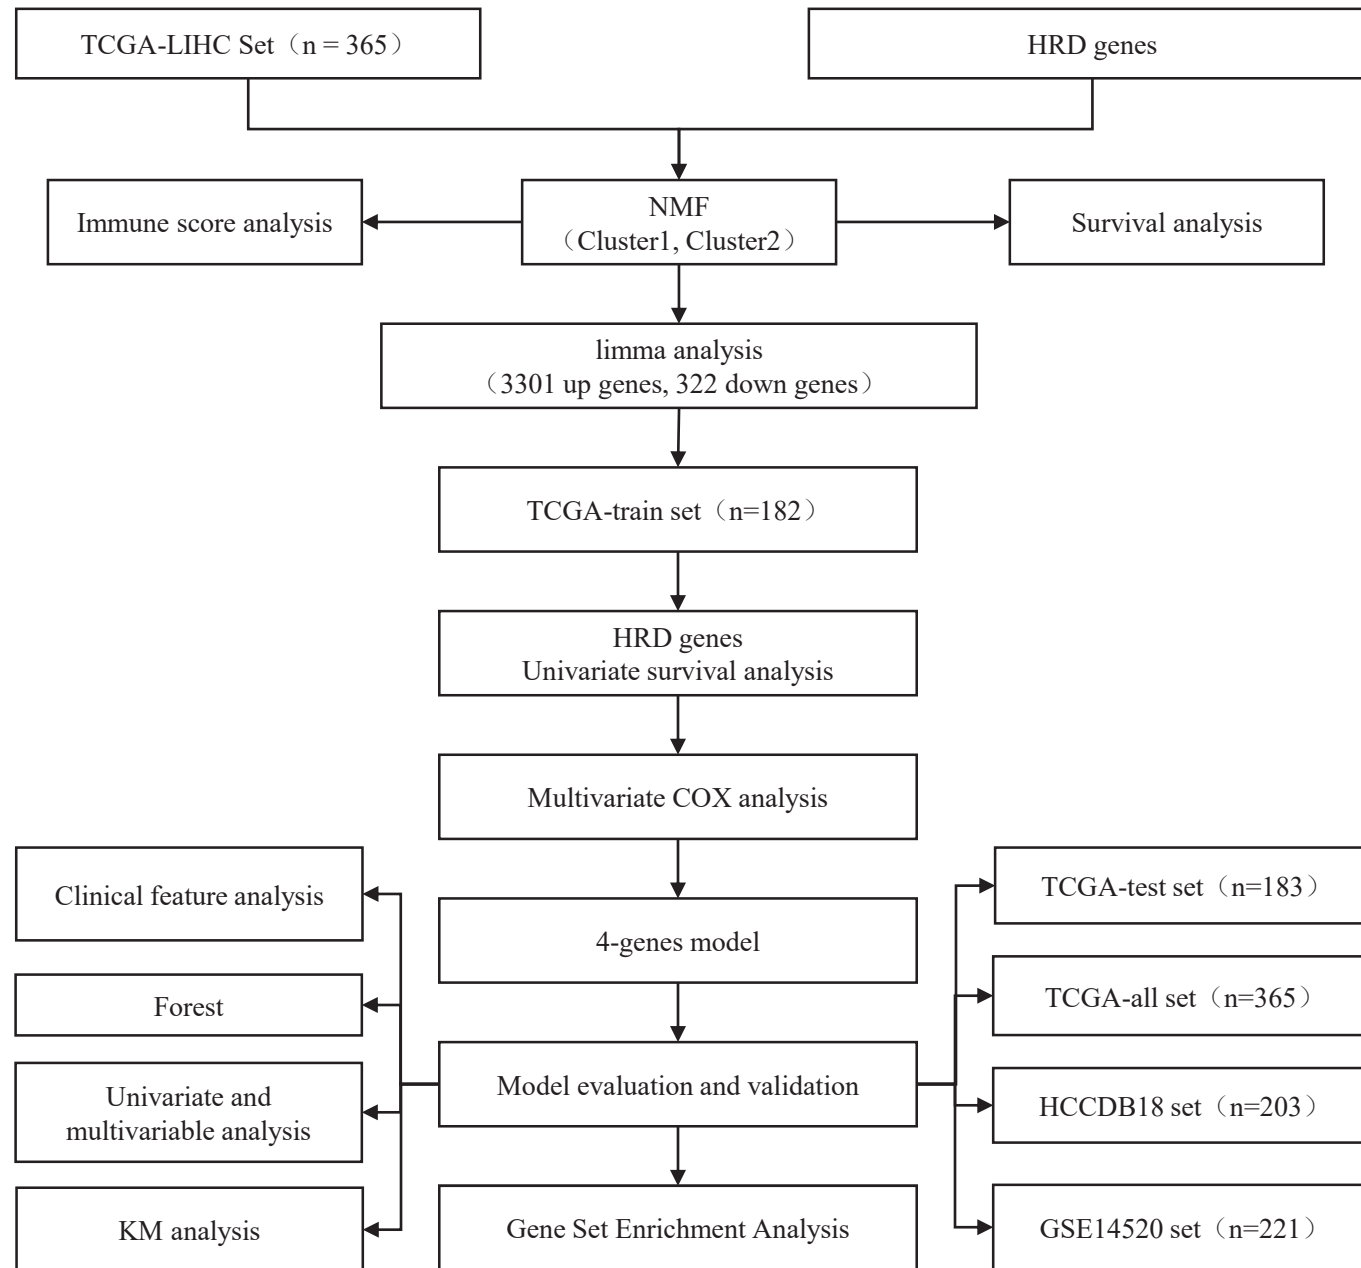

Supplement: 41598_2021_3432_MOESM3_ESM.pdf [file 41598_2021_3432_MOESM3_ESM.pdf]
